# Supplementary material
Source: PubMed Central journal article supplement (PMC3114654)
Supplement: supp_kxq080_biosts-10058-File008.pdf [file supp_kxq080_biosts-10058-File008.pdf]

## **Supplemental materials for semiparametric inference for a two-stage outcome-auxiliary-dependent sampling design with continuous outcome**

HAIBO ZHOU\*

*Department of Biostatistics, University of North Carolina at Chapel Hill,  
Chapel Hill, NC 27599-7420, USA*  
zhou@bios.unc.edu

YUANSHAN WU

*Department of Biostatistics, University of North Carolina at Chapel Hill,  
Chapel Hill, NC 27599-7420, USA, and  
School of Mathematics and Statistics, Wuhan University,  
Wuhan, Hubei 430072, China*  
yswu@bios.unc.edu

YANYAN LIU

*School of Mathematics and Statistics, Wuhan University,  
Wuhan, Hubei 430072, China*  
liuyy@whu.edu.cn

JIANWEN CAI

*Department of Biostatistics, University of North Carolina at Chapel Hill,  
Chapel Hill, NC 27599-7420, USA*  
cai@bios.unc.edu

\*To whom correspondence should be addressed.

## 1. FROM LIKELIHOOD TO ESTIMATED LOG-LIKELIHOOD

In this section, we intend to derive estimated log-likelihood from the likelihood function. It can be shown that the full likelihood based on all the observations under two-stage OADS design is proportional to

$$L_F(\beta) = \left[ \prod_{k=0}^K \prod_{i \in \tilde{V}_k} f(Y_i|Z_i, X_i; \beta)g(X_i|Z_i, W_i) \right] \left[ \prod_{k=1}^K \prod_{i \in \tilde{V}_k} \int_{\mathcal{X}} f(Y_i|Z_i, x; \beta)dG(x|Z_i, W_i) \right]. \quad (\text{A.1})$$

Let  $S$  denote the informative components of  $(Z, W)$  in the sense that  $G(X|Z, W) = G(X|S)$  almost surely. Without loss of generality, assume  $S$  is continuous variable with dimension  $d$ . Note that

$$G(x|s) = \sum_{k=1}^K \pi_k(s)G_k(x|s),$$

where  $\pi_k(s) = \Pr((Y, W) \in \Delta_k|s)$  and  $G_k(x|s) = G(x|s, (Y, W) \in \Delta_k)$ . Then we estimate the  $\pi_k(s)$  and  $G_k(x|s)$  respectively by

$$\hat{\pi}_k(s) = \frac{\sum_{i=1}^N I((Y_i, W_i) \in \Delta_k)\phi_{h_N}(S_i - s)}{\sum_{i=1}^N \phi_{h_N}(S_i - s)}$$

and

$$\hat{G}_k(x|s) = \frac{\sum_{i \in V_k} I(X_i \leq x)\phi_{h_N}(S_i - s)}{\sum_{i \in V_k} \phi_{h_N}(S_i - s)},$$

where  $I(\cdot)$  is an indicator function and  $\phi_{h_N}(\cdot) = \phi(\frac{\cdot}{h_N})$  is a  $d$ -dimensional kernel function with the bandwidth  $h_N$ . For simplicity, we suppress the subscript of  $h_N$  hereafter. Hence,  $G(x|s)$  can be subsequently estimated by

$$\hat{G}(x|s) = \sum_{k=1}^K \hat{\pi}_k(s)\hat{G}_k(x|s),$$

which is a consistent estimator as shown below.

Hence, we obtain an estimated likelihood function by substituting  $G(x|s)$  in (A.1) with  $\hat{G}(x|s)$  and

denote it by

$$\widehat{L}_F(\beta) = \left[ \prod_{k=0}^K \prod_{i \in \tilde{V}_k} f(Y_i|Z_i, X_i; \beta) \widehat{g}(X_i|S_i) \right] \left[ \prod_{k=1}^K \prod_{i \in \tilde{V}_k} \int_{\mathcal{X}} f(Y_i|Z_i, x; \beta) d\widehat{G}(x|S_i) \right]. \quad (\text{A.2})$$

Then the estimated log-likelihood function is

$$\begin{aligned} \widehat{l}_F(\beta) &\equiv \log \widehat{L}_F(\beta) \\ &= \sum_{k=0}^K \sum_{i \in \tilde{V}_k} \log f(Y_i|Z_i, X_i; \beta) + \sum_{k=0}^K \sum_{i \in \tilde{V}_k} \log \widehat{g}(X_i|S_i) + \sum_{k=1}^K \sum_{j \in \tilde{V}_k} \log \widehat{f}(Y_j|Z_j, W_j; \beta) \\ &= \sum_{k=1}^K \sum_{i \in V_k} \log f(Y_i|Z_i, X_i; \beta) + \sum_{k=1}^K \sum_{i \in V_k} \log \widehat{g}(X_i|S_i) + \sum_{k=1}^K \sum_{j \in \tilde{V}_k} \log \widehat{f}(Y_j|Z_j, W_j; \beta) \\ &= \sum_{k=1}^K \sum_{i \in V_k} \log f(Y_i|Z_i, X_i; \beta) + \sum_{k=1}^K \sum_{j \in \tilde{V}_k} \log \widehat{f}(Y_j|Z_j, W_j; \beta) + C, \end{aligned}$$

where

$$\begin{aligned} \widehat{f}(Y_j|Z_j, W_j; \beta) &= \int_{\mathcal{X}} f(Y_j|Z_j, x; \beta) d\widehat{G}(x|S_j) \\ &= \sum_{r=1}^K \widehat{\pi}_r(S_j) \frac{\sum_{l \in V_r} f(Y_j|Z_j, X_l; \beta) \phi_h(S_l - S_j)}{\sum_{l \in V_r} \phi_h(S_l - S_j)}, \end{aligned}$$

and  $C = \sum_{k=1}^K \sum_{i \in V_k} \log \widehat{g}(X_i|S_i)$ , which is not dependent on  $\beta$ .

## 2. REGULARITY CONDITIONS

The following conditions are imposed to investigate the asymptotic properties of the estimator  $\widehat{\beta}$ .

C1.  $f(y|z, x; \beta)$  has the 2nd-order continuous derivatives with respect to  $\beta$ , for every  $\beta \in \mathcal{B}$ , where  $\mathcal{B}$  is the parametric space, a compact subset in Euclidean space  $\mathcal{R}^q$ , containing  $\beta^0$  as its interior point.

C2. When  $N$  goes to  $\infty$ ,  $|V|/N \rightarrow \rho_V > 0$  and  $n_k/|V| \rightarrow \rho_k \geq 0$  for  $k = 0, \dots, K$ . Let  $\gamma_k = \Pr\{(Y, W) \in \Delta_k\}$ .

C3.  $\phi(\cdot)$  is a  $\alpha$ th-order bounded and symmetric kernel function with bounded support and  $\int \phi^2 < \infty$ .

$Nh^{2\alpha} \rightarrow 0$  and  $Nh^{4d} \rightarrow \infty$  as  $N$  converges to  $\infty$ .

C4. The following expected value matrices are all finite and positive definite at  $\beta^0$ :

$$E \left[ \frac{\partial^2 \log(f(Y|Z, X; \beta^0))}{\partial \beta \partial \beta^T} \right], \quad E_k \left[ \frac{\partial^2 \log(f(Y|Z, X; \beta^0))}{\partial \beta \partial \beta^T} \right], \quad E_k \left[ \frac{\partial^2 \log(f(Y|Z, W; \beta^0))}{\partial \beta \partial \beta^T} \right].$$

### 3. A USEFUL LEMMA

LEMMA 1. Let  $\xi(\underline{y}, \underline{z}, \underline{w}, \underline{x}; \beta)$  be a continuous function of  $\beta \in \mathcal{B}$  for every  $(\underline{y}, \underline{z}, \underline{w}, \underline{x})$ , satisfying that:

(i).  $|\xi(\underline{y}, \underline{z}, \underline{w}, \underline{x}; \beta)|$  is bounded, uniformly in  $\beta$ , by some function of  $(\underline{y}, \underline{z}, \underline{w}, \underline{x})$ , denoted by  $\tilde{\xi}(\underline{y}, \underline{z}, \underline{w}, \underline{x})$ ;

(ii). For  $k = 1, \dots, K$ ,  $\left| \int_{\mathcal{X}} \tilde{\xi}(\underline{y}, \underline{z}, \underline{w}, \underline{x}) G(d\mathbf{x} | \underline{s}, (y, w) \in \Delta_k) \right| < \infty$ , almost surely, given  $(Y = y, W = w) \in \Delta_k$  and  $S = \underline{s}$ .

Then

$$\sup_{\beta \in \mathcal{B}} \left| \frac{\sum_{i \in V_k} \xi(\underline{y}, \underline{z}, \underline{w}, X_i; \beta) \phi_h(S_i - \underline{s})}{\sum_{i \in V_k} \phi_h(S_i - \underline{s})} - \int_{\mathcal{X}} \xi(\underline{y}, \underline{z}, \underline{w}, \underline{x}; \beta) G(d\mathbf{x} | \underline{s}, (y, w) \in \Delta_k) \right| = O_p(\eta_N),$$

where  $\eta_N = (Nh^{2\alpha} + (Nh^{2d})^{-1})^{1/2}$ .

**Proof.** Denote

$$\mu_k(\underline{\mathcal{Q}}; \beta) = \frac{1}{(n_k + n_{0k})h^d} \sum_{i \in V_k} \xi(\underline{y}, \underline{z}, \underline{w}, X_i; \beta) \phi_h(S_i - \underline{s})$$

and

$$\nu_k(\underline{\mathcal{Q}}) = \frac{1}{(n_k + n_{0k})h^d} \sum_{i \in V_k} \phi_h(S_i - \underline{s}),$$

where  $\underline{\mathcal{Q}}$  denotes  $(\underline{y}, \underline{z}, \underline{w}, \underline{s})$  or its some suitable components. Under conditions (i) and (ii), noting that given  $(Y, W) \in \Delta_k$ ,  $(X_i, S_i; i \in V_k)$  are i.i.d., and then using the uniform strong law of large numbers

and Taylor expansion, we can show that

$$\mu_k(\underline{\mathcal{Q}}; \beta) \rightarrow \int_{\mathcal{X}} \xi(\underline{\mathcal{Q}}, x; \beta) q(dx, \underline{s}|(y, w) \in \Delta_k),$$

almost surely, uniformly for all  $\beta \in \mathcal{B}$ , where

$$q(x, s|(y, w) \in \Delta_k) = \frac{d^2 \Pr(X \leq x, S \leq s|(y, w) \in \Delta_k)}{dx ds}$$

is the joint density function of  $(X, S)$  given  $(Y = y, W = w) \in \Delta_k$ .

Specially taking  $\xi \equiv 1$ , we have

$$\nu_k(\underline{\mathcal{Q}}) \rightarrow \int_{\mathcal{X}} q(dx, \underline{s}|(y, w) \in \Delta_k),$$

almost surely. Hence,

$$\sup_{\beta \in \mathcal{B}} \left| \frac{\mu_k(\underline{\mathcal{Q}}; \beta)}{\nu_k(\underline{\mathcal{Q}})} - \int_{\mathcal{X}} \xi(\underline{\mathcal{Q}}, x; \beta) G(dx|\underline{s}, (y, w) \in \Delta_k) \right| \rightarrow 0, \quad a.s.$$

Using the Lemma 1 in Wang and Wang (2001) and standard kernel estimation theory, one can further derive that

$$\sup_{\beta \in \mathcal{B}} \left| \frac{\mu_k(\underline{\mathcal{Q}}; \beta)}{\nu_k(\underline{\mathcal{Q}})} - \int_{\mathcal{X}} \xi(\underline{\mathcal{Q}}, x; \beta) G(dx|\underline{s}, (y, w) \in \Delta_k) \right| = O_p(\eta_N).$$

Thus we complete the proof.

Furthermore, it is straightforward to conclude that

$$\sup_{\beta \in \mathcal{B}} \left| \sum_{k=1}^K \hat{\pi}_k(\underline{s}) \frac{\mu_k(\underline{\mathcal{Q}}; \beta)}{\nu_k(\underline{\mathcal{Q}})} - \int_{\mathcal{X}} \xi(\underline{\mathcal{Q}}, x; \beta) G(dx|\underline{s}) \right| = O_p(\eta_N).$$

#### 4. USEFUL CONCLUSIONS

We introduce the following conclusions that are frequently used in the proving process and their derivations are based on Lemma 1.

(i). For  $j \in \bar{V}_k$  and  $S_j$  fixed,  $\widehat{G}(x|S_j) = G(x|S_j) + O_p(\eta_N)$ .

(ii). Let  $\frac{\partial^a}{\partial \beta^a} f(Y_j|Z_j, W_j; \beta)$  be the  $a$ -th derivative of  $f(Y_j|Z_j, W_j; \beta)$  with respect to  $\beta$ , then for  $j \in \bar{V}_k$

$$\frac{\partial^a}{\partial \beta^a} \widehat{f}(Y_j|Z_j, W_j; \beta) = \frac{\partial^a}{\partial \beta^a} f(Y_j|Z_j, W_j; \beta) + O_p(\eta_N).$$

(iii). For  $j \in \bar{V}_k$ ,

$$\frac{f(Y_j|Z_j, W_j; \beta)}{\widehat{f}(Y_j|Z_j, W_j; \beta)} = 1 + O_p(\eta_N),$$

and

$$\begin{aligned} & \frac{1}{\sqrt{N}} \sum_{k=1}^K \sum_{j \in \bar{V}_k} \left\{ \frac{\frac{\partial}{\partial \beta} \widehat{f}(Y_j|Z_j, W_j; \beta)}{f(Y_j|Z_j, W_j; \beta)} - \frac{\frac{\partial}{\partial \beta} f(Y_j|Z_j, W_j; \beta)}{[f(Y_j|Z_j, W_j; \beta)]^2} \widehat{f}(Y_j|Z_j, W_j; \beta) \right\} \times \left\{ \frac{f(Y_j|Z_j, W_j; \beta)}{\widehat{f}(Y_j|Z_j, W_j; \beta)} - 1 \right\} \\ &= O_p(\eta_N). \end{aligned}$$

Note that the first and second results are obvious from Lemma 1. The third result is followed from the Lemmas 3.7 and 3.8 in Weaver (2001).

## 5. PROOF OF THEOREM 1

### Consistency

By selecting suitable function  $\xi$  in Lemma 1, it can be shown that

$$\frac{1}{N} \left[ \frac{\partial \widehat{U}_F(\beta)}{\partial \beta^T} - \frac{\partial U_F(\beta)}{\partial \beta^T} \right] \rightarrow_p \mathbf{0},$$

uniformly over  $\beta \in \mathcal{B}$ , as  $N \rightarrow \infty$ , where  $U_F(\beta) = \frac{\partial \log L_F(\beta)}{\partial \beta}$ .

On the other hand, it follows from the convergence of  $-\frac{1}{N} \frac{\partial U_F(\beta)}{\partial \beta^T}$  to  $I(\beta)$  in probability, uniformly for  $\beta \in \mathcal{B}$ , that

$$-\frac{1}{N} \frac{\partial \widehat{U}_F(\beta)}{\partial \beta^T} \rightarrow_p I(\beta), \tag{A.3}$$

uniformly for  $\beta \in \mathcal{B}$ , as  $N \rightarrow \infty$ .

It follows from Lemma 1 that

$$\frac{1}{N} \widehat{U}_F(\beta) - \frac{1}{N} U_F(\beta) \rightarrow_p 0,$$

uniformly over  $\beta \in \mathcal{B}$ , as  $N \rightarrow \infty$ . Furthermore, we can show that by strong law of large numbers

$$\begin{aligned} \frac{1}{N} U_F(\beta) &= \rho_0 \rho_V E \left[ \frac{\partial \log(f(Y|Z, X; \beta))}{\partial \beta} \right] + \sum_{k=1}^K \rho_k \rho_V E_k \left[ \frac{\partial \log(f(Y|Z, X; \beta))}{\partial \beta} \right] \\ &\quad + \sum_{k=1}^K [\gamma_k^0 (1 - \rho_0 \rho_V) - \rho_k \rho_V] E_k \left[ \frac{\partial \log(f(Y|Z, W; \beta))}{\partial \beta} \right] + o_p(1), \end{aligned}$$

and then  $\frac{1}{N} U_F(\beta^0) \rightarrow_p 0$  follows directly. Hence,

$$\frac{1}{N} \widehat{U}_F(\beta^0) \rightarrow_p 0. \tag{A.4}$$

Therefore, combining conditions C1, C4, and (A.3) and (A.4), the consistency of  $\widehat{\beta}$  follows from Foutz (1977) and Weaver and Zhou (2005).

### Asymptotic Normality

Firstly, we want to evaluate the difference, induced by kernel smother, between the estimated score

function  $\widehat{U}_F(\beta)$  and score function  $U_F(\beta)$ . Using arguments in Pepe and Fleming (1991), we have

$$\begin{aligned}
& \frac{1}{\sqrt{N}} \widehat{U}_F(\beta) \\
&= \frac{1}{\sqrt{N}} \sum_{k=1}^K \sum_{j \in \bar{V}_k} \left\{ \frac{\frac{\partial}{\partial \beta} \widehat{f}(Y_j | Z_j, W_j; \beta)}{\widehat{f}(Y_j | Z_j, W_j; \beta)} - \frac{\frac{\partial}{\partial \beta} f(Y_j | Z_j, W_j; \beta)}{f(Y_j | Z_j, W_j; \beta)} \right\} + \frac{1}{\sqrt{N}} U_F(\beta) \\
&= \frac{1}{\sqrt{N}} \sum_{k=1}^K \sum_{j \in \bar{V}_k} \left\{ \frac{\frac{\partial}{\partial \beta} \widehat{f}(Y_j | Z_j, W_j; \beta)}{f(Y_j | Z_j, W_j; \beta)} - \frac{\frac{\partial}{\partial \beta} f(Y_j | Z_j, W_j; \beta)}{[f(Y_j | Z_j, W_j; \beta)]^2} \widehat{f}(Y_j | Z_j, W_j; \beta) \right\} \\
&\quad \times \frac{f(Y_j | Z_j, W_j; \beta)}{\widehat{f}(Y_j | Z_j, W_j; \beta)} + \frac{1}{\sqrt{N}} U_F(\beta) \\
&= \frac{1}{\sqrt{N}} \sum_{k=1}^K \sum_{j \in \bar{V}_k} \left\{ \frac{\frac{\partial}{\partial \beta} \widehat{f}(Y_j | Z_j, W_j; \beta)}{f(Y_j | Z_j, W_j; \beta)} - \frac{\frac{\partial}{\partial \beta} f(Y_j | Z_j, W_j; \beta)}{[f(Y_j | Z_j, W_j; \beta)]^2} \widehat{f}(Y_j | Z_j, W_j; \beta) \right\} \\
&\quad + \frac{1}{\sqrt{N}} U_F(\beta) + O_p(\eta_N) \\
&\equiv \frac{1}{\sqrt{N}} D_F(\beta) + \frac{1}{\sqrt{N}} U_F(\beta) + O_p(\eta_N)
\end{aligned}$$

Secondly, we will establish the weak convergence of  $\frac{1}{\sqrt{N}} D_F(\beta)$ . We rewrite

$$\begin{aligned}
& \frac{1}{\sqrt{N}} D_F(\beta) \\
&= \frac{1}{\sqrt{N}} \sum_{k=1}^K \sum_{j \in \bar{V}_k} \sum_{r=1}^K \widehat{\pi}_r(S_j) \frac{\sum_{i \in V_r} M_{X_i, S_i}(Y_j, Z_j, W_j; \beta) \phi_h(S_i - S_j)}{\sum_{i \in V_r} \phi_h(S_i - S_j)} \\
&= \frac{1}{\sqrt{N}} \sum_{r=1}^K \sum_{i \in V_r} \sum_{k=1}^K \sum_{j \in \bar{V}_k} \frac{N_r(S_j)}{n_{V_r}(S_j)} \frac{n_{\bar{V}_k}(S_j)}{N(S_j)} \frac{M_{X_i, S_i}(Y_j, Z_j, W_j; \beta) \phi_h(S_i - S_j)}{n_{\bar{V}_k}(S_j)} \\
&= \frac{1}{\sqrt{N}} \sum_{r=1}^K \frac{\gamma_r^0}{\rho_r \rho_V + \gamma_r^0 \rho_0 \rho_V} \sum_{i \in V_r} \sum_{k=1}^K [\gamma_k^0 (1 - \rho_0 \rho_V) - \rho_k \rho_V] \pi_k(S_i) E_k(M_{X_i, S_i}(Y, Z, W; \beta) | S_i) \\
&\quad + o_p(1).
\end{aligned}$$

Using Liapounov's central limit theorem and the Cramér-Wold theorem as Weaver and Zhou (2005), we

can show that

$$\frac{1}{\sqrt{N}} D_F(\beta^0) \rightarrow_d \mathcal{N}(0, \sum_{k=1}^K \frac{(\gamma_k^0)^2}{\rho_k \rho_V + \gamma_k^0 \rho_0 \rho_V} \Sigma_k(\beta^0)). \quad (\text{A.5})$$



Thirdly,

$$\frac{1}{\sqrt{N}}U_F(\beta) = \frac{1}{\sqrt{N}} \sum_{k=0}^K \sum_{i \in \tilde{V}_k} \frac{\frac{\partial}{\partial \beta} f(Y_i|Z_i, X_i; \beta)}{f(Y_i|Z_i, X_i; \beta)} + \frac{1}{\sqrt{N}} \sum_{k=1}^K \sum_{j \in \tilde{V}_k} \frac{\frac{\partial}{\partial \beta} f(Y_j|Z_j, W_j; \beta)}{f(Y_j|Z_j, W_j; \beta)}, \quad (\text{A.6})$$

and from here, it is easy to show that  $\frac{1}{\sqrt{N}}U_F(\beta^0)$  converges weakly to a normal distribution with mean zero and variance  $I(\beta^0)$ . On the other hand, since  $\frac{1}{\sqrt{N}}D_F(\beta^0)$  can be regarded as a function of  $\{X_i, S_i; i \in V\}$  for large  $N$ , it is asymptotically independent of the second term at  $\beta^0$  in (A.6), which are contributions from the nonvalidation data to the true score function. It can be also shown that  $\frac{1}{\sqrt{N}}D_F(\beta^0)$  and the first term of (A.6) at  $\beta^0$  are asymptotically uncorrelated and, since they are each asymptotically normal, independent. Hence,  $\frac{1}{\sqrt{N}}D_F(\beta^0)$  and  $\frac{1}{\sqrt{N}}U_F(\beta^0)$  are asymptotically independent, and then combining (A.5), we have

$$\frac{1}{\sqrt{N}}\hat{U}_F(\beta^0) \rightarrow_d \mathcal{N}(0, I(\beta^0) + \sum_{k=1}^K \frac{(\gamma_k^0)^2}{\rho_k \rho_V + \gamma_k^0 \rho_0 \rho_V} \Sigma_k(\beta^0)). \quad (\text{A.7})$$

Finally, using the first-order Taylor series expansion of the estimated score function around the true parameter  $\beta_0$ , we have

$$\sqrt{N}(\hat{\beta} - \beta^0) = \left[ -\frac{1}{N} \frac{\partial \hat{U}_F(\beta^*)}{\partial \beta^T} \right]^{-1} \left[ \frac{1}{\sqrt{N}} \hat{U}_F(\beta^0) \right], \quad (\text{A.8})$$

where  $\beta^*$  is on the line segment between  $\hat{\beta}$  and  $\beta^0$ . Using conditions C1 and C4, (A.3), and consistency of  $\hat{\beta}$ , it is obvious to conclude that as  $N \rightarrow \infty$

$$\left[ -\frac{1}{N} \frac{\partial \hat{U}_F(\beta^*)}{\partial \beta^T} \right]^{-1} \rightarrow_p I^{-1}(\beta^0). \quad (\text{A.9})$$

Combining (A.7), (A.8), and (A.9), we have

$$\sqrt{N}(\hat{\beta} - \beta^0) \rightarrow_d \mathcal{N}(0, \Sigma(\beta^0)),$$

which is the desired result.

Additionally, with respect to the proof for Theorem 2, since it is obvious to show the consistency of  $-\frac{1}{N} \frac{\partial \widehat{U}_F(\widehat{\beta})}{\partial \beta^T}$  for  $I(\beta^0)$  from (A.9), it remains to show that  $\widehat{\Sigma}_k(\widehat{\beta})$  is a consistent estimator for  $\Sigma_k(\beta^0)$  for every  $k$ , which can be proved by using (A.5) and Lemma 1.

## 6. EFFICIENCY COMPARISONS ALONG THE INFORMATIVE STRENGTH

In this section, we want to investigate the effect of informative strength of  $W$  for  $X$  on the proposed estimates. Table A.1 listed below summarizes the similarity and difference among these estimators with special comments on each estimator. More specifically, the efficiency difference for methods  $\beta_{Y_1}$ ,  $\beta_{Y_2}$ ,  $\beta_{P_1}$ , and  $\beta_{P_2}$  should be attributed to the study design instead of estimating procedure. However,  $\beta_{P_2}$  and  $\beta_W$  are different estimating procedures under the same two-stage OADS design.

Table A. 1. Summary for different methods compared in simulation study

| Method        | Design   | Data structure                          | Stage of data used | Comment                                    |
|---------------|----------|-----------------------------------------|--------------------|--------------------------------------------|
|               | 1st/2nd  | 1st/2nd                                 | in inference       |                                            |
| $\beta_E$     | SRS      | $\{Y, X, Z\}/-$                         | 1st                | Least square estimate                      |
| $\beta_W$     | SRS/OADS | $\{Y, Z, W\}/\{X (Y, W) \in \Delta_k\}$ | 2nd only           | Inverse probability weight                 |
| $\beta_{Y_1}$ | SRS/ODS  | $\{Y\}/\{(X, Z) Y \in A_j\}$            | 1st and 2nd        | Weaver and Zhou (2005)                     |
| $\beta_{Y_2}$ | SRS/ODS  | $\{Y, Z\}/\{X Y \in A_j\}$              | 1st and 2nd        | Modified from $\beta_{Y_1}$                |
| $\beta_{P_1}$ | SRS/ODS  | $\{Y, Z, W\}/\{X Y \in A_j\}$           | 1st and 2nd        | Proposed method reduced from $\beta_{P_2}$ |
| $\beta_{P_2}$ | SRS/OADS | $\{Y, Z, W\}/\{X (Y, W) \in \Delta_k\}$ | 1st and 2nd        | Proposed method                            |

Figure A.1 demonstrates the effect of the strength of  $W$ , represented by  $\sigma$ , on the efficiency of estimator  $\widehat{\beta}_1$ , under the methods considered. It displays the relative efficiency of  $\widehat{\beta}_{P_1 1}$ ,  $\widehat{\beta}_{P_2 1}$ ,  $\widehat{\beta}_{Y_1 1}$ ,  $\widehat{\beta}_{Y_2 1}$ ,  $\widehat{\beta}_{W 1}$ , and  $\widehat{\beta}_{R 1}$  to  $\widehat{\beta}_{E 1}$ , under varying  $\sigma$  from 0 to 1.5 with *allocation*(120, 60) and cutpoints  $(\frac{1}{3}, \frac{2}{3})$ . The other parametric settings remain to be as the same as Table 1. Note that among these estimators only  $\widehat{\beta}_{P_1 1}$  and  $\widehat{\beta}_{P_2 1}$  depend on  $\sigma$ . Clearly, the efficiency loss of both  $\widehat{\beta}_{P_1 1}$  and  $\widehat{\beta}_{P_2 1}$  increases when  $\sigma$  increases, that is, when  $W$  is less informative for  $X$ . However, the asymptotic relative efficiency  $ARE(\widehat{\beta}_{P_2 1}|\widehat{\beta}_{E 1})$ , is

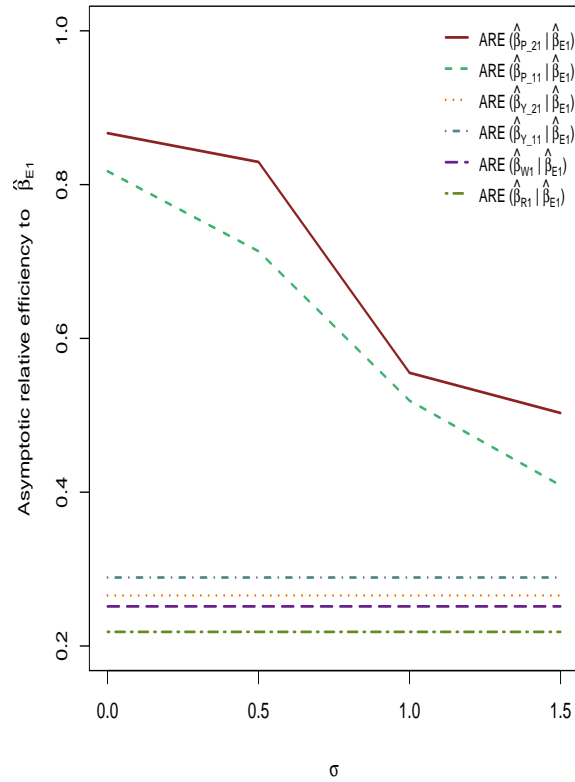

Fig. A.1. Efficiency comparisons of estimator  $\hat{\beta}_1$  along with the informative strength of auxiliary  $W$  for covariate  $X$ . Y-axis denotes the asymptotic relative efficiency of  $\hat{\beta}_{P_{21}}, \hat{\beta}_{P_{11}}, \hat{\beta}_{Y_{21}}, \hat{\beta}_{Y_{11}}, \hat{\beta}_{W1}$ , and  $\hat{\beta}_{R1}$  to  $\hat{\beta}_{E1}$ .  $ARE(\hat{\beta}_{P_{21}} | \hat{\beta}_{E1})$  is defined as the ratio of  $var(\hat{\beta}_{E1})$  over  $var(\hat{\beta}_{P_{21}})$ . X-axis denotes the informative strength  $\sigma$ . The larger  $\sigma$  represents weaker information strength of  $W$  for  $X$ .

always higher than that of the other estimators, which indicates that the proposed two-stage OADS design utilizes  $W$  better than the other designs, and that incorporating the auxiliary information into statistical inference can substantially improve the efficiency, especially when  $W$  is more informative about  $X$ .

#### REFERENCES

FOUTZ, R. V. (1977). On the unique consistent solution to the likelihood equations. *Journal of the American Statis-*

*tical Association* **72**, 147–148.

PEPE, M. S. AND FLEMING, T. R. (1991). A nonparametric method for dealing with mismeasured covariate data. *Journal of the American Statistical Association* **86**, 108–113.

WANG, S. AND WANG, C. Y. (2001). A note on kernel assisted estimators in missing covariate regression. *Statistics and Probability Letters* **55**, 439–449.

WEAVER, M. A. (2001). Semiparametric methods for continuous outcome regression models with covariate data from an outcome-dependent subsample, Ph.D. Thesis, University of North Carolina at Chapel Hill.

WEAVER, M. A. AND ZHOU, H. (2005). An estimated likelihood method for continuous outcome regression models with outcome-dependent sampling. *Journal of the American Statistical Association* **100**, 459–469.
